# Supplementary material
Source: Royal Society of Chemistry journal article supplement (doi:10.1039/d5cp04659a)
Supplement: d5cp04659a1.pdf [file d5cp04659a1.pdf]

## Supplementary Materials

---

### DFT Investigation of Gas Adsorption and Electronic Modulation on Cd- and Zn-Decorated PdSe<sub>2</sub> Monolayers for Sensor Applications to NO, CO, and NO<sub>2</sub>

Achraf Benbella<sup>a</sup>, M'hammed Mazroui<sup>a</sup>

<sup>a</sup> Faculty of Sciences Ben M'Sik, Hassan II University of Casablanca, 20670, Morocco  
email address: achraf.benbellaa@gmail.com

---

---

#### Optimized PdSe<sub>2</sub> structure

Number of atoms: 54

Lattice vectors (Å):

```
Lattice="17.265165329 0.0 0.0 0.0 17.702804565 0.0 0.0 0.0 20.000001907"  
Properties=species:S:1:pos:R:3 pbc="T T T"
```

Cartesian coordinates (Å):

|    |            |             |            |
|----|------------|-------------|------------|
| Pd | 2.87719857 | 0.00041655  | 0.81216812 |
| Pd | 2.87719807 | 5.90135069  | 0.81216790 |
| Pd | 2.87719916 | 11.80228651 | 0.81216850 |
| Pd | 8.63225345 | 0.00041687  | 0.81216810 |
| Pd | 8.63225333 | 5.90135110  | 0.81216796 |
| Pd | 8.63225433 | 11.80228699 | 0.81216858 |

|    |             |             |            |
|----|-------------|-------------|------------|
| Pd | 14.38730769 | 0.00041704  | 0.81216776 |
| Pd | 14.38730743 | 5.90135129  | 0.81216762 |
| Pd | 14.38730830 | 11.80228702 | 0.81216806 |
| Pd | 0.00033054  | 2.95088325  | 0.81216750 |
| Pd | 0.00033103  | 8.85181711  | 0.81216716 |
| Pd | 0.00033149  | 14.75275210 | 0.81216698 |
| Pd | 5.75538692  | 2.95088244  | 0.81216692 |
| Pd | 5.75538756  | 8.85181660  | 0.81216656 |
| Pd | 5.75538780  | 14.75275155 | 0.81216644 |
| Pd | 11.51044123 | 2.95088320  | 0.81216732 |
| Pd | 11.51044201 | 8.85181706  | 0.81216696 |
| Pd | 11.51044196 | 14.75275214 | 0.81216684 |
| Se | 0.62606608  | 0.70585269  | 0.04932114 |
| Se | 0.62606604  | 6.60678743  | 0.04932122 |
| Se | 0.62606561  | 12.50772267 | 0.04932068 |
| Se | 6.38112040  | 0.70585306  | 0.04932150 |
| Se | 6.38112033  | 6.60678778  | 0.04932120 |
| Se | 6.38111992  | 12.50772320 | 0.04932094 |
| Se | 12.13617590 | 0.70585265  | 0.04932152 |
| Se | 12.13617606 | 6.60678737  | 0.04932166 |
| Se | 12.13617552 | 12.50772260 | 0.04932104 |
| Se | 5.12881843  | 5.19904756  | 1.57614279 |
| Se | 5.12881841  | 11.09998306 | 1.57614335 |
| Se | 5.12881840  | 17.00091772 | 1.57614301 |
| Se | 10.88387426 | 5.19904713  | 1.57614265 |
| Se | 10.88387417 | 11.09998258 | 1.57614327 |
| Se | 10.88387416 | 17.00091733 | 1.57614311 |
| Se | 16.63892886 | 5.19904711  | 1.57614287 |
| Se | 16.63892893 | 11.09998246 | 1.57614353 |
| Se | 16.63892898 | 17.00091734 | 1.57614353 |
| Se | 3.50376325  | 2.24857933  | 1.57614275 |
| Se | 3.50376282  | 8.14951400  | 1.57614331 |
| Se | 3.50376280  | 14.05044881 | 1.57614331 |
| Se | 9.25881866  | 2.24857972  | 1.57614277 |
| Se | 9.25881834  | 8.14951439  | 1.57614335 |
| Se | 9.25881809  | 14.05044918 | 1.57614335 |
| Se | 15.01387346 | 2.24857966  | 1.57614259 |
| Se | 15.01387320 | 8.14951412  | 1.57614287 |

|    |             |             |            |
|----|-------------|-------------|------------|
| Se | 15.01387292 | 14.05044892 | 1.57614327 |
| Se | 2.25146154  | 3.65632008  | 0.04932154 |
| Se | 2.25146154  | 9.55725445  | 0.04932086 |
| Se | 2.25146148  | 15.45818950 | 0.04932124 |
| Se | 8.00651598  | 3.65631932  | 0.04932144 |
| Se | 8.00651605  | 9.55725373  | 0.04932070 |
| Se | 8.00651581  | 15.45818884 | 0.04932134 |
| Se | 13.76157128 | 3.65631987  | 0.04932148 |
| Se | 13.76157131 | 9.55725408  | 0.04932084 |
| Se | 13.76157121 | 15.45818918 | 0.04932102 |
